# Supplementary material for: Characterization of Nanoparticle Dispersion in Red Blood Cell Suspension by the Lattice Boltzmann-Immersed Boundary Method
Source: Nanomaterials (Basel). 2016 Feb 5;6(2):30. doi: 10.3390/nano6020030 (PMC5302481; doi:10.3390/nano6020030)
Supplement: Supplementary file 1 [file nanomaterials-06-00030-s001.zip]

Archive with 4 entries (4 files):
- Fig3A_tumblingshear40_s.mpeg
- Fig3B_tanktreadingshear200_s.mpeg
- Fig5_channelflow200_s.mpeg
- nanomaterials-06-00030 supplementary.pdf
